1 **A high-throughput analysis method of microdroplet PCR coupled**  
2 **with fluorescence spectrophotometry**

3 Yanan Du<sup>3+</sup>, Xiao Zhao<sup>1, 2+</sup>, Binan Zhao<sup>4</sup>, Yan Xu<sup>3</sup>, Wei Shi<sup>3</sup>, Fangfang Ren<sup>3</sup>,  
4 Yangyang Wu<sup>3</sup>, Ruili Hu<sup>3</sup>, Xiaorui Fan<sup>3</sup>, Qi Zhang<sup>3</sup>, Xiaoxia Zhang<sup>3</sup>, Bin Shi<sup>5</sup>,  
5 Huanzhen Zhao<sup>5</sup>, Kai Zhao<sup>1, 2\*</sup>

6 <sup>1</sup>Biotechnology Research Institute, Shanghai Academy of Agricultural Sciences,  
7 Shanghai 201106, China.

8 <sup>2</sup>Key Laboratory of Agricultural Genetics and Breeding, Shanghai Academy of  
9 Agricultural Sciences, Shanghai 201106, China.

10 <sup>3</sup>College of Life and Environment Sciences, Shanghai Normal University, Shanghai  
11 200234, China.

12 <sup>4</sup>Department of Clinical Medicine, XuZhou Medical University, Xuzhou, Jiangsu  
13 221106, China.

14 <sup>5</sup>Shanghai Bio-full Biotech Co.,Ltd, Shanghai 201106, China.

15 <sup>+</sup>Y.N.D. and X.Z. contributed equally to this work.

16 <sup>\*</sup>Correspondence: Kai Zhao, Tel.: +86 021 62203047 E-mail: kzhao118@163.com.

17

18 Running Title: microdroplet PCR fluorescence spectrophotometry

19 Character count: 23501

20 Key words: fluorescence spectrophotometry/ foodborne pathogenic bacteria/ GM  
21 maize/ high-throughput detection/microdroplet PCR/quantitative detection

## 22 **Abstract**

23 Here we report a novel microdroplet PCR method combined with fluorescence  
24 spectrophotometry (MPFS), which allows for qualitative, quantitative and  
25 high-throughput detection of multiple DNA targets. In this study, each pair of primers  
26 was labeled with a specific fluorophore. Through microdroplet PCR, a target DNA  
27 was amplified and labeled with the same fluorophore. After products purification, the  
28 DNA products tagged with different fluorophores could be analyzed qualitatively by  
29 the fluorescent intensity determination. The relative fluorescence unit was also  
30 measured to construct the standard curve and to achieve quantitative analysis. In a  
31 reaction, the co-amplified products with different fluorophores could be  
32 simultaneously analyzed to achieve high-throughput detection. We used four kinds of  
33 GM maize as a model to confirm this theory. The qualitative results revealed high  
34 specificity and sensitivity of 0.5% (w/w). The quantitative results revealed that the  
35 limit of detection was  $10^3$  copies and with good repeatability. Moreover,  
36 reproducibility assay were further performed using four foodborne pathogenic  
37 bacteria. Consequently, the same qualitative, quantitative and high-throughput results  
38 were confirmed as the four GM maize.

## 39 **Introduction**

40 With the increasing of the number of bimolecular samples to be analyzed, it demands  
41 a high-throughput detection method capable of both qualification and quantification.  
42 Traditional detection technology can usually only detect one target gene in one

43 reaction. When dealing with complex nucleic acid samples, multiple  
44 reactions/detection need to be separately performed, which is time consuming and  
45 costly. Therefore, it is of great value to develop a method which enables qualitative  
46 and quantitative detection simultaneously at reasonable cost. Indeed, several multiplex  
47 detection methods of target genes had been developed and employed in the fields,  
48 such as food/feed identifications (Settanni and Corsetti 2007; Chaouachi et al. 2014;  
49 Morisset et al. 2008; Guo et al. 2011), medical diagnostics (Barken et al. 2007;  
50 Uttamchandani et al. 2009; Ge et al. 2006) and large scale sequencing (Porreca et al.  
51 2007; Tewhey et al. 2009; Krishnakumar et al. 2008).

52 Although conventional multiplex PCR were always used to amplify nucleic acid  
53 samples, many problems exist against its wide use, such as preferential amplification  
54 of shorter DNA templates, interference of multiple primer pairs and limited substrates,  
55 making it incapable in quantitative and high-throughput research (Meyerhans et al.  
56 1990; Dahl et al. 2005). Real-time qPCR has been widely used to quantify target  
57 genes with high sensitivity, specificity and a wide dynamic range (Heid et al. 1996;  
58 Higuchi et al. 1993; Wittwer et al. 1997; Holland et al.1991), the throughput in such a  
59 scheme is low because of the limited number of channels in the real-time system.  
60 DNA microarray is an approach to analyze complex nucleic samples with high  
61 throughput, the complicated procedure and expensive consumption, however, limit its  
62 feasible availability for most laboratories. Poor linearity is another weakness related  
63 with DNA microarray which limits its use in quantitative analysis (Hessner et al.  
64 2003). Therefore, a novel qualitative, quantitative and high-throughput method for

65 detecting multiple biological genes is on demand.

66 The multiplex emulsion PCR has been developed for high-throughput simultaneous  
67 amplification of several DNA targets, either used alone (Chaouachi et al. 2008;  
68 Williams et al. 2006) or combined with other methods (Guo et al. 2011; Barken et al.  
69 2007). In emulsion PCR, the different target DNA molecules are amplified in parallel  
70 in millions of compartmentalized micro-reservoirs, which alleviates the drawbacks in  
71 conventional multiplex PCR while increasing the throughput and reducing the reagent  
72 and sample consumption.

73 In this paper, we describe a novel high-throughput method developed in our  
74 laboratory, which combines microdroplet PCR with fluorescence spectrophotometry  
75 (MPFS). The MPFS method used the primers labeled with different fluorophores,  
76 without detection interference, so that the multitarget DNAs in one sample could be  
77 amplified in a single reaction set and analyzed both qualitatively and quantitatively on  
78 Infinite M1000 PRO, after products purification. This method has been tested with  
79 four event specific GM maize and four foodborn pathogenic bacteria with satisfaction.  
80 The MPFS method provides a new approach for qualitative, quantitative and  
81 high-throughput analysis of multitarget DNAs to a broad range of biological samples.

## 82 **Results**

### 83 **The Principle of MPFS**

84 In MPFS, each of the fluorophores has its own intrinsic excitation and emission

85 wavelength that can be identified and measured by the Infinite M1000 PRO. Each pair  
86 of primers specific to a target sequence was labeled with a specific fluorophore that  
87 does not interfere with any other fluorophores in the same reaction set for detection  
88 purpose. Through the emulsion PCR, a target DNA was amplified and labeled with  
89 the same fluorophore. After PCR reaction, the products were purified by PCR cleanup  
90 kit to remove the free primers and other disruptive substances. Finally, the DNA  
91 products tagged with different fluorophores could be used for qualitative analysis by  
92 the fluorescent intensity determination. The relative fluorescence unit (RFU) was also  
93 measured to construct the standard curve and then the quantitative analysis could be  
94 achieved. Since a variety of different target samples were simultaneously amplified in  
95 a single PCR tube, the co-amplified products with different fluorophores could be  
96 simultaneously analyzed to achieve high-throughput detection.

### 97 **BT176, GA21, NK603 and TC1507 Singleplex Assay**

#### 98 *Specificity Assay and Qualitative Detection*

99 In order to confirm the specificity of the singleplex MPFS method, a mixed DNA  
100 template solution containing eight events (BT176 maize, GA21 maize, NK603 maize,  
101 TC1507 maize, non-GM maize, soybean, and rapeseed), no template control (NTC)  
102 and a pair of labeled primers was employed. Results are shown in the Table 1. In  
103 BT176 specificity assay, only the RFUs of BT176 genome and the positive control  
104 (BT176 plasmid) were higher than the threshold and revealed positive. While others  
105 revealed negative. GA21 maize, NK603 maize and TC1507 maize showed the similar

106 results as BT176.

107 The specificity of maize endogenous gene was assessed on a series of template  
108 samples. The template samples include endogenous gene plasmid (positive control),  
109 BT176 maize, GA21 maize, NK603 maize, TC1507 maize, non-GM maize, NTC,  
110 soybean, rapeseed, wheat, cotton and rice. As a result (Table 1), only the RFUs of  
111 endogenous gene plasmid, BT176 maize, GA21 maize, NK603 maize, TC1507 maize  
112 and non-GM maize were higher than the threshold and showed positive signal. Others  
113 revealed negative.

114 Therefore, the singleplex MPFS PCR assay demonstrated high specificity for  
115 detecting GM maize and maize endogenous gene.

#### 116 *Sensitivity Assay*

117 For testing the sensitivity of the singleplex MPFS method, four series of relative  
118 GMO content (fortified at 10%, 5%, 1%, and 0.5%) were employed as templates,  
119 respectively. Results were shown in Table 2. As shown, all RFU values of Bt176  
120 maize were higher than the threshold and increased along with the GMO content.  
121 GA21 maize, NK603 maize and TC1507 maize showed the similar results as BT176  
122 maize. Of notes, all four maize samples were detected positive as low as 0.5% (w/w)  
123 GMO content that is lower than EU regulations.

124 Therefore, the singleplex MPFS PCR assay demonstrated high sensitivity for  
125 detection of GM maize.

126 *Construction of Standard Curves and Quantitative Detection*

127 Five concentrations from  $10^3$  to  $10^7$  copies of four GM maize and endogenous gene  
128 were used to construct singleplex standard curves with NTC as control. Results are  
129 shown in the Figure 1. In BT176 assay, the plots showed a typical log-linear standard  
130 curve and the regression correlation coefficient ( $R^2$ ) value were 0.9996, which  
131 indicated excellent relationship between the DNA template copy numbers and the  
132 RFU values. It is also true to other samples, such as GA21 maize, NK603 maize and  
133 TC1507 maize, as well as the maize endogenous gene. The limit of detection (LOD)  
134 was  $10^3$  copies in all the five samples. Therefore, the singleplex MPFS method  
135 demonstrated high accuracy and can be used to quantify the GM maize.

136 **BT176, GA21, NK603 and TC1507 Multiplex Assay**

137 *Specificity Assay, Qualitative Detection and High Throughput*

138 Specificity of the 4-plex of MPFS were confirmed on the DNA materials containing  
139 four events (BT176 maize, GA21 maize, NK603 maize, TC1507 maize) in a single  
140 reaction. Results are shown in the Table 3. The RFU of four maize genomes were  
141 higher than the threshold and showed positive signals. While the NTC revealed  
142 negative. Therefore, the 4-plex MPFS assay demonstrated high throughput and the  
143 same specificity as the single MPFS assay. Overall these data showed that increasing  
144 the number of templates in the MFPS method did not affect the result of qualitative  
145 detection.

146 *Sensitivity Assay*

147 Sensitivity of 4-plex MPFS method was investigated on the DNA materials containing  
148 four GM maize genomes at all levels (fortified at 10%, 5%, 1%, and 0.5%) in a single  
149 tube. Results are shown in the Table 4. All RFU values of four GM maize genomes at  
150 all levels were higher than the corresponding threshold and revealed positive signal.  
151 The results suggested that four GM maize could be detected simultaneously at a  
152 starting template concentration as low as 0.5%, which was also lower than that in EU  
153 regulation and in consistent with singleplex analysis results. Therefore, the 4-plex  
154 MPFS method could be used to detect GM content with high sensitivity and high  
155 throughput.

156 *Construction of Standard Curves and Quantitative Detection*

157 Standard curves of 4-plex MPFS assay were established with a series of 5 dilutions  
158 ( $10^3$ – $10^7$  copies) containing four GM maize. Results are shown in the Figure 2. All  
159 four GM maize showed an excellent linearity between the logarithm of RFU and copy  
160 numbers. The LOD of the 4-plex MPFS method is  $10^3$  copies. This is in good line with  
161 the singleplex assay, indicating the 4-plex MPFS PCR assay is of high accuracy and  
162 can be used to quantify the GM maize with high throughput.

163 **Repeatability**

164 The repeatability of the 4-plex MPFS system for GM maize was measured by ten  
165 intra-assays and ten inter-assays at a copy number of  $10^6$  in each assay. As the results



166 shown in (Table 5), the coefficient of variation (CV) varied between 0.6-2.3% in the  
167 same batch and between 9.6-14.5% in the ten different batches, which fully satisfied  
168 the acceptance criterion.

### 169 **The Detection of Simulated Samples**

170 To validate the accuracy and precision of MPFS method, four simulated samples were  
171 tested. Each sample was repeatedly amplified in triplex. After that, the mean RFU  
172 were determined and used to calculate the corresponding copies through the formula  
173 from the corresponding standard curve. The simulated percentage was calculated  
174 according to the ratio of the event-specific GM maize and the endogenous gene copy  
175 numbers. The GM contents calculated from experiments showed a slight deviation  
176 from the known GM contents (Table 6). Thus this method was accurate and precise  
177 enough to evaluate the GM contents in unknown samples.

### 178 **Reproducibility**

179 To evaluate the applicability of MPFS method, another four foodborne pathogenic  
180 bacteria were also tested. This 4-plex MPFS assay was performed and analyzed in the  
181 manner of MPFS system described above except for the PCR amplification system.

### 182 *Specificity Assay, Qualitative Detection and High Throughput*

183 The DNA mixtures containing four foodborne pathogenic bacteria were used as  
184 template to evaluate the specificity of the 4-plex MPFS again. Results showed that the

185 RFU values from four foodborne pathogenic bacteria genome amplifications were  
186 higher than the corresponding threshold (Table 7). Therefore, the 4-plex MPFS PCR  
187 assay for four foodborne pathogenic bacteria showed the same specificity as the  
188 MPFS assay for four GM maize. This indicates that the MFPS method can also be  
189 applied to qualitatively detect multiple genes in other biological samples.

#### 190 *Construction of Standard Curves and Quantitative Detection*

191 Standard curves of 4-plex MPFS PCR assay for four foodborne pathogenic bacteria  
192 were established again with mixed four DNA dilutions. The logarithm of RFU values  
193 and the target gene copy number showed excellent linear relationship for all four  
194 bacteria (Fig. 3). The LOD was determined to be  $10^3$  copies. Again, the results are in  
195 good line with the results of 4-plex MPFS assay for four GM maize samples,  
196 implying its potential use in quantifying the genes in other biological samples with  
197 high throughput.

#### 198 *Repeatability*

199 The repeatability of the MPFS system for four foodborne pathogenic bacteria were  
200 studied by ten intra-assays and ten inter-assays for four foodborne pathogenic bacteria  
201 at a copy number of  $10^6$ . The coefficient of variation (CV) was determined between  
202 1.2-2.2% in the same batch and between 9.1-11.8% among the ten different batches,  
203 in good line with the repeatability of the four GM maize assay (Table 8).

204 Altogether, the results demonstrated good specificity, sensitivity, linearity and  
205 repeatability of this MPFS method developed in our laboratory, which could be used

206 for qualitative, quantitative and high-throughput detection and analysis of multiple  
207 genes in a single reaction.

## 208 **Discussion**

209 In this study, we combined microdroplet PCR with fluorescence spectrophotometry  
210 (MPFS) and applied it to qualitative, quantitative and high-throughput detection of  
211 four target DNAs. GM maize was selected as a model for this purpose. By means of  
212 labeling the different gene-specific primer with different fluorophores without  
213 detection interference, multiple target DNAs could be co-amplified in a single PCR  
214 reaction, and amplicons could be analyzed qualitatively and quantitatively with high  
215 throughput. The method was proved to be free of cross interference from different  
216 fluorophores, and of sensitivity of 0.5% (w/w) GM content, lower than 0.9% of EU  
217 criterion. In addition, this method generates the data with excellent linearity  
218 relationship between the logarithm of RFU values and gene copy number and with a  
219 LOD of  $10^3$  gene copy number. The 4-plex method increased the throughput by  
220 microdroplet PCR reaction from single MPFS assay but not sacrifice the quality of  
221 resulting data. The small signal strength variation within batch or between batches  
222 further confirmed the precision and accuracy of this MPFS method. Finally, the  
223 results from foodborne pathogenic bacteria showed the applicability of MPFS method  
224 to other biological samples.

225 The excellence of MPFS method is apparently attributable to the combination of  
226 emulsion PCR and fluorescence spectrophotometry. Microdroplet PCR allows for

227 improving the throughput, which avoids constraints in multiple PCR by partitioning  
228 the reaction mixture into discrete droplets while remaining the specificity and  
229 sensitivity. Microdroplet PCR, also called emulsion PCR, was first systematically  
230 described by Williams et al. to amplify complex DNA mixtures by  
231 compartmentalization of genes in water-in oil (w/o) emulsion (Williams et al. 2006).  
232 Emulsion PCR method was consisted of emulsion PCR and analysis of the products.  
233 Williams et al. used agarose gel electrophoresis to analyze the PCR products. But  
234 Williams' method can only be used for qualitative assay and not for quantitative assay  
235 (Williams et al. 2006). And the contamination derived from the agarose gel  
236 electrophoresis was a defect. Guo et al also used microdroplet PCR implemented  
237 capillary gel electroresis to amplified and analyze multiple DNA targets (Guo et al.  
238 2011). However, the two-step method is relative complicated and it can not used for  
239 quantitative assay too. Droplet digital PCR enables absolute quantitation of low  
240 copies sample, but it needs skilled operators and expensive consumption and the  
241 results is astable (Hindson et al. 2011). However, we combined microdroplet PCR  
242 with fluorescence spectrophotometry to amplify and analyze multiple targeted DNA  
243 qualitatively and quantitatively with high throughput. Conventional PCR could only  
244 be used for qualitative detection, but can not be used for quantitative detection and the  
245 throughput was limited (Germini et al. 2004). In the MPFS method, the PCR products  
246 were directly measured by Infinite M1000 PRO to avoid the contamination derived  
247 from the agarose gel electrophoresis. Both the real-time quantitative PCR and our  
248 MPFS method employed fluorescence labeling technique. Real-time quantitative PCR

249 enables quantitative detection with low LOD and high accuracy, it has, however, limit  
250 in the throughput due to limited detecting channels (Chaouachi et al. 2013). The  
251 MPFS method used Infinite M1000 PRO to measure the RFU of the fluorescence,  
252 which allows for detecting emission wavelength from 200 to 1000nm (Thermo  
253 VarioSkan Flash), that is, 12 fluorophores can be analyzed in a well. With appropriate  
254 adjustment, almost 20 fluorophores could be tested simultaneously in a well, which  
255 means more than 6000 genes can be detected in a 384-well plate at a time. Therefore,  
256 our method could detect abundant target genes simultaneously. DNA microarray is  
257 good for high-throughput and qualitative analysis, but not good for quantitative assay.  
258 The DNA microarray also uses fluorescence labeling technique, however, the  
259 problems in biochip microfabrication technology limits its popularization and  
260 application. Also, preparation of high-density array was time consuming and the  
261 confocal laser scanner is expensive (Hessner et al. 2003). In the process of  
262 amplification with microarray, the target sample was found easy to be contaminated  
263 and the signal-to-noise would be affected (Hessner et al. 2003). As a contrast, MPFS  
264 method needs only conventional PCR thermocycle instrument and a fluoro-microplate  
265 reader (or fluorospectrophotometer) to detect multiple target DNAs qualitatively and  
266 quantitatively with high throughput, clearly indicating its association with simplicity,  
267 speediness, concision and low cost.

268 Emulsion PCR were performed according to the method of Richard et al. (Williams et  
269 al. 2006) with some improvement such as the time interval every two drop (6s), the  
270 composition of the oil phase, the 3×8mm stir bar, the ampoule with a lid and the

271 adoption of centrifugation to break the emulsion without other process.

272 Many emulsion PCR techniques currently adopted combine with a known  
273 instrumentation and technologies for DNA analysis, such as agarose gel  
274 electrophoresis (Williams et al. 2006), microarray (Ge et al. 2006), capillary  
275 electrophoresis (Guo et al. 2011), micro-fluidic chip (Zhu et al. 2012). Our new  
276 analysis method for multiple target DNAs, fluorescence spectrophotometry, has been  
277 not reported previously. The combination of fluorescence spectrophotometry with the  
278 emulsion PCR, to our knowledge, is the first report to detect multiple target DNAs  
279 qualitatively and quantitatively with high throughput. The excellent performance of  
280 the MPFS method enables its application in the fields of animal husbandry and  
281 veterinary pathogenic microorganisms, human pathogenic microorganisms, aquatic  
282 pathogenic microorganisms, environmental microbes and plant pathogenic microbes.  
283 The MPFS method could also be used for detection of varieties of human  
284 disease-related genes and genetic counseling.

285 The brilliant performance of MPFS system described in this study is still dimmed by  
286 the manual purification of emulsion products. This, however, can be improved by the  
287 use of automatic purification system, by then the repeatability and accuracy will be  
288 greatly improved.

## 289 **Materials and Methods**

### 290 **Materials**

291 GM maize flour i.e., Bt176, GA21, NK603 and TC1507, were supplied by Monsanto

292 Company (St. Louis, MO). Non-transgenic seeds (maize soybean, rapeseed, cotton,  
293 wheat) were purchased from a local market in Shanghai, China. Four common  
294 foodborne pathogenic bacteria i.e., Salmonella, Listeria monocytogenes, Escherichia  
295 coli and Staphylococcus aureus DNA and plasmids used for reproducibility assay  
296 were obtained from this laboratory.

### 297 **Sample Preparation**

298 The genomic DNA of all plant materials were extracted and purified using a  
299 mini-plant genomic DNA extraction kit (Shanghai Bio-ful Biotech Co., Ltd., Shanghai,  
300 China). The DNA concentration and quality were estimated using a NanoDrop 1000  
301 UV-Vis spectrophotometer (NanoDrop Technologies, LLC, Wilmington, DE).

302 To test the sensitivity, a series of targeted GM DNA solution were obtained by mixing  
303 the GM maize flour with non-GM maize flour. The final relative GM maize content  
304 was 10%, 5%, 1%, 0.5% (w/w) for four GM maize, respectively. Moreover,  
305 event-specific genes were used for the construction of standard plasmids as calibrators  
306 for GMO quantification and represented an alternative to genomic DNA. Additionally,  
307 various GM contents (1%, 3% and 5% GM, w/w) of four simulated samples were also  
308 prepared to evaluate the accuracy and precision of MPFS system. Easy dilution  
309 (TaKaRa biotechnology Co., Ltd, Dalian, China) was used to dilute the standard  
310 plasmids to avoid DNA loss due to adsorption to the tube walls.

### 311 **Set-up of MPSF Reaction**

312 *The selection of Fluorescence*

313 Fluorescence labeling technique was used to label primers. When the sum of  
314 excitation and emission bandwidth was less than stokes shift of a fluorophore, the  
315 optimal excitation and emission wavelength could be set to get stronger signal and  
316 prevent overlap. Based on parameter characteristics of the Tecan Infinite M1000 PRO  
317 and Thermo VarioSkan Flash, the excitation bandwidth was 5nm and the emission  
318 bandwidth was 12 nm. So the fluorophores, whose stokes shift were more than 17nm,  
319 were more suitable to be selected. Furthermore, the excitation spectrum and emission  
320 spectrum of two adjacent fluorophores should not be overlapped either. On the basis  
321 of the above principles, twelve fluorophores were selected from more than 300  
322 fluorophores which can be used at the same time. The excitation and emission  
323 wavelength were properly adjusted without affecting the fluorescence strength and  
324 sensitivity, then almost 20 fluorophores could be tested simultaneously. In this study,  
325 four fluorophores were elaborately selected and four pairs of primers were labeled  
326 with selected fluorophores (Table 9) and synthesized (Thermo Fisher Scientific Co.,  
327 Ltd., Shanghai, China) to amplify the targeted DNA.

### 328 *Singleplex PCR Composition*

329 The aqueous phase for four GM maize in individual reaction consisted of 1×PCR  
330 buffer, 10g/L BSA, 0.2mM dNTPs, 0.4 uM of forward and reverse primers, 26U Taq  
331 DNA polymerase and 10.4 μL template DNA in a total volume of 260uL.

### 332 *Multiplex PCR Composition*



333 Four single PCR for four GM maize were pooled into one reaction with the same  
334 composition except for the amount of primers and Taq polymerase. The optimized  
335 primers and templates were as follows: 0.2uM for each pair of forward and reverse  
336 primers and 104U for Taq polymerase.

337 Multiplex PCR aqueous phase for four foodborne pathogenic bacteria consisted of  
338 10×PCR buffer, 10g/L BSA, 0.2 mM Mg<sup>2+</sup>, 0.3 mM dNTPs, 0.2 uM for each pair of  
339 forward and reverse primers, 16.25U Taq DNA polymerase and 6.5 µL template  
340 DNA in a total volume of 260uL.

#### 341 *Microdroplet PCR Amplification*

342 The emulsion PCR was carried out according to a previously described emulsion  
343 PCR-based method (Williams et al. 2006) with several modifications. The  
344 oil-surfactant mixture was prepared by mixing the 4.5ml span 80, 0.4ml tween 80,  
345 0.05ml triton X-100 and 95.05 ml mineral oil at 1000 r.p.m for 2h. At 1000r.p.m, the  
346 water-in-oil emulsion were obtained through adding 200ul of the aqueous phase to  
347 400ul oil phase drop-wise (time interval is 6s) while stirring with a magnetic stirring  
348 bar (3×8mm) in a disposal 2ml ampoule with a lid at 25 °C. Over the period of 5min,  
349 the water-in-oil mixture is processed into discrete encapsulation of individual reaction.  
350 After that, the obtained w/o emulsion was delivered into PCR tubes as 12 aliquots of  
351 50 µL for further thermal cycling and residual 50 ul of the aqueous phase were used as  
352 a no emulsified control. The PCR for four GM maize were performed as the following  
353 program: 95°C for 5min; 35 cycles at 94°C for 30s, 57°C for 40s, 68°C for 35s; a final

354 extension at 68°C for 7min and then hold at 4°C. The PCR protocols for four  
355 foodborne pathogenic bacteria were as the follows: 94°C for 5min; 35 cycles at 94°C  
356 for 30s, 60°C for 30s, 72°C for 30s; a final extension at 72°C for 7min and then hold  
357 at 4°C.

358 Prior to the standard analyzing protocol for the PCR products, the resulting emulsion  
359 mixtures were pooled and centrifuged at 16200g for 5min. Approximately 140ul of  
360 lower aqueous phase contained fluorescent target DNA were then obtained and  
361 purified to remove the residual primers. An AxyPrep PCR Cleanup Kit (Axygen  
362 Scientific, Inc.) was used in accordance with the manufacturer's instructions except  
363 for eluting with 100 µL elution buffer to get the final amplicons for subsequent  
364 analysis.

#### 365 **Infinite 200<sup>®</sup> PRO and Magellan analysis**

366 Magellan Standard software and Infinite M1000 PRO (Tecan Austria GmbH, Grödig,  
367 Austria) possessing narrow bandwidths were used for multiple labeling analyses in  
368 line with the manufacturer's standard instructions. The resulting samples from PCR  
369 were directly transferred to a disposal, black, flat-bottom, 384-well Fluorotrac<sup>™</sup> 200  
370 plates (Greiner Bio-One Suns Co., Ltd, Beijing, China). Fluorescent intensity scan  
371 were performed to determine the optimal excitation and emission wavelength (Table 5).  
372 Top-read determination of fluorescence intensity was performed for qualitative,  
373 quantitative and high-throughput analysis. Due to the intrinsic excitation and emission  
374 wavelength of fluorescence, the RFU of four kinds of targets DNA harboring four

375 fluorophores could be measured respectively. The manual gain was set to 100. All the  
376 data generated was derived to Excel to conducted relative analysis.

### 377 *Fluorescence Intensity Determination*

378 In Bt176's case, fluorescence intensity was performed on the resulting DNA samples  
379 to be analyzed with the following parameters: excitation wavelength  $\lambda=470\text{nm}$  and  
380 emission wavelength  $\lambda=522\text{nm}$ . A gradient of standard samples and the mapping  
381 concentration were set to construct the standard curve. Furthermore, the linear  
382 regression analysis, the correlation coefficient and blank reduction were adopted to  
383 provide a net RFU increase which would be proportional to DNA copies in the  
384 resulting products.

### 385 **Calculation of threshold**

386 Following the MPFS method we developed, 1000 negative samples were used for  
387 determination of the threshold. Based on statistically analysis of the RFU from  
388 negative, they form a normal distribution.

389 As a threshold signal value, a level mapping to blank (no template control, NTC)  $\bar{x} +$   
390  $4\text{SD}$  was chosen as criterion for a positive signal. The probability density of the  
391 normal distribution is:

$$392 \quad f(x) = \frac{1}{\sqrt{2\pi}\sigma} \exp\left(-\frac{(x-\mu)^2}{2\sigma^2}\right)$$

393 Where  $\mu$  is the mean or expectation of the distribution and also its median and  
394 mode( $\bar{x}$ ),  $\sigma$  is the standard deviation (SD),  $\sigma^2$  is the variance, and  $x$  is the  
395 independent variable for which you want to evaluate the function.

## 396 **Acknowledgments**

397 This work was financially supported by Shanghai Minhang Science Committee  
398 foundation of China, Major projects of industrialization, grant no. 2014MH076.

## 399 **Author contributions**

400 K.Z. conceived the initial hypothesis, designed experiments, wrote and edited the  
401 manuscript, K.Z., Y.N.D., X.Z., W.S. and B.A.Z. performed most of the experiments,  
402 F.F.R, Y.Y.W. and R.L.H. performed some of the experiments, B.S. and H.Z.Z  
403 contributed reagents/materials/analysis tools, Y.X., X.R.F., Q.Z. and X.X.Z. analyzed  
404 the data, Y.N.D. and X.Z. wrote the manuscript.

## 405 **Conflict of interest**

406 The authors declare no competing interests.

## 407 **References**

408 Barken KB, Haagensen JA, Tolker-Nielsen T (2007) Advances in nucleic acid-based  
409 diagnostics of bacterial infections. *Clin Chim Acta* 384: 1-11.

410 Chaouachi M, Alaya A, Ali IB, Hafsa AB, Nabi N, Bérard A, Romaniuk M, Skhiri F,

- 411 Saïd K (2013) Development of real-time PCR method for the detection and the  
412 quantification of a new endogenous reference gene in sugar beet "Beta vulgaris L."  
413 GMO application. *Plant Cell Rep* 32:117-128.
- 414 Chaouachi M, Chupeau G, Berard A, McKhann H, Romaniuk M, Giancola S, Laval V,  
415 Bertheau Y, Brunel D (2008) A high-throughput multiplex method adapted for GMO  
416 detection. *J Agric Food Chem* 56:11596-11606.
- 417 Chaouachi M, Zellama MS, Nabi N, Hafsa AB, Saïd K (2014) Molecular  
418 identification of four genetically modified maizes (Bt11, Bt176, Mon810 and T25) by  
419 duplex quantitative real-time PCR. *Food Anal Methods* 7: 224-233.
- 420 Dahl F, Gullberg M, Stenberg J, Landegren U, Nilsson M (2005) Multiplex  
421 amplification enabled by selective circularization of large sets of genomic DNA  
422 fragments. *Nucleic Acids Res* 33: e71.
- 423 Ge Q, Bai Y, Liu Z, Liu Q, Yan L, Lu Z (2006) Detection of fetal DNA in maternal  
424 plasma by microarray coupled with emulsions PCR. *Clini Chim Acta* 369: 82-88.
- 425 Germini A, Zanetti A, Salati C, Rossi S, Forré C, Schmid S, Marchelli R, Fogher C  
426 (2004) Development of a Seven-Target Multiplex PCR for the Simultaneous  
427 Detection of Transgenic Soybean and Maize in Feeds and Foods. *J Agric Food Chem*  
428 52:3275-3280.
- 429 Guo J Yang L, Chen L, Morisset D, Li X, Pan L, Zhang D (2011) MPIC: A

430 High-Throughput Analytical Method for Multiple DNA Targets. *Anal Chem* 83:  
431 1579-1586.

432 Heid CA, Stevens J, Livak KJ, Williams PM (1996) Real time quantitative PCR.  
433 *Genome Res* 6: 986-994.

434 Hessner MJ, Wang X, Hulse K, Meyer L, Wu Y, Nye S, Guo SW, Ghosh S (2003)  
435 Three color cDNA microarrays: quantitative assessment through the use of  
436 fluorescein-labeled probes. *Nucleic Acids Res* 31: e14.

437 Higuchi R, Fockler C, Dollinger G, Watson R (1993) Kinetic PCR analysis: real-time  
438 monitoring of DNA amplification reactions. *Nat Biotechnol* 11:1026-1030.

439 Hindson BJ, Ness KD, Masquelier DA, Belgrader P, Heredia NJ, Makarewicz AJ,  
440 Bright IJ, Lucero MY, Hiddessen AL, Legler TC, *et al* (2011) High-throughput droplet  
441 digital PCR system for absolute quantitation of DNA copy number. *Anal Chem* 83:  
442 8604-8610.

443 Holland PM, Abramson RD, Watson R, Gelfand DH (1991) Detection of specific  
444 polymerase chain reaction product by utilizing the 5'----3' exonuclease activity of  
445 *Thermus aquaticus* DNA polymerase. *Proc Natl Acad Sci USA* 88: 7276-7280.

446 Krishnakumar S, Zheng J, Wilhelmy J, Faham M, Mindrinos M, Davis R (2008) A  
447 comprehensive assay for targeted multiplex amplification of human DNA sequences.  
448 *Proc Natl Acad Sci USA* 105: 9296-9301.

- 449 Meyerhans A, Vartanian JP, Wain-Hobson S (1990) DNA recombination during PCR.  
450 *Nucleic Acids Res* 18: 1687-1691.
- 451 Morisset D, Dobnik D, Hamels S, Žel J, Gruden K (2008) NAIMA: target  
452 amplification strategy allowing quantitative on-chip detection of GMOs. *Nucleic*  
453 *Acids Res* 36: e118.
- 454 Porreca GJ, Zhang K, Li JB, Xie B, Austin D, Vassallo SL, LeProust EM, Peck BJ,  
455 Emig CJ, Dahl F, *et al* (2007) Multiplex amplification of large sets of human exons.  
456 *Nat Methods* 4: 931-936.
- 457 Settanni L, Corsetti A (2007) The use of multiplex PCR to detect and differentiate  
458 food- and beverage-associated microorganisms: a review. *J Microbiol Methods*  
459 69:1-22.
- 460 Tewhey R, Warner JB, Nakano M, Libby B, Medkova M, David PH, Kotsopoulos SK,  
461 Samuels ML, Hutchison J, Larson JW, *et al* (2009) Microdroplet-based PCR  
462 enrichment for large-scale targeted sequencing. *Nat Biotechnol* 27:1025-1031.
- 463 Uttamchandani M, Neo JL, Ong BN, Moochhala S (2009) Applications of  
464 microarrays in pathogen detection and biodefence. *Trends Biotechnol* 27: 53-61.
- 465 Williams R, Peisajovich SG, Miller OJ, Magdassi S, Tawfik DS, Griffiths AD (2006)  
466 Amplification of complex gene libraries by emulsion PCR. *Nat Methods* 3: 545-550.
- 467 Wittwer CT, Herrmann MG, Moss AA, Rasmussen RP (1997) Continuous

468 fluorescence monitoring of rapid cycle DNA amplification. *Biotechniques* 22: 130.

469 Zhu Z, Jenkins G, Zhang W, Zhang M, Guan Z, Yang CJ (2012) Single-molecule

470 emulsion PCR in microfluidic droplets. *Anal Bioanal Chem* 403: 2127-2143.

## 471 **Figure legends:**

472 **Figure 1 BT176, GA21, NK603 and TC1507 Singleplex standard curves.** RFU:

473 Relative fluorescence units; Copies: The copies of plasmids.

474 **Figure 2 BT176, GA21, NK603 and TC1507 multiplex standard curves.** RFU:

475 Relative fluorescence units; Copies: The copies of plasmids.

476 **Figure 3 four foodborne pathogenic bacteria multiplex standard curves.**

477 RFU: Relative fluorescence units; Copies: The copies of plasmids; L. monocytogenes: Listeria

478 monocytogenes; E. coli: Escherichia coli; S. aureus: Staphylococcus aureus.

## 479 **Tables**

480 Table 1 BT176, GA21, NK603 and TC1507 singleplex specificity assay.

| Samples   | BT176(RFU) | GA21(RFU) | NK603(RFU) | TC1507(RFU) | IVR(RFU) |
|-----------|------------|-----------|------------|-------------|----------|
| BT176 PC  | 28739(+)   |           |            |             |          |
| GA21 PC   |            | 7957(+)   |            |             |          |
| NK603 PC  |            |           | 16272(+)   |             |          |
| TC1507 PC |            |           |            | 27249(+)    |          |
| IVR PC    |            |           |            |             | 27166(+) |



|               |          |          |         |          |          |
|---------------|----------|----------|---------|----------|----------|
| BT176 maize   | 8654(+)  | 5926(+)  | 686(-)  | 2016(-)  | 27390(+) |
| GA21 maize    | 1998(-)  | 1593(-)  | 739(-)  | 2096(-)  | 28234(+) |
| NK603 maize   | 1567(-)  | 1838(-)  | 9119(+) | 2145(-)  | 28019(+) |
| TC1507maize   | 2088(-)  | 1663(-)  | 660(-)  | 23345(+) | 27441(+) |
| Wild maize    | 1492 (-) | 1697(-)  | 633(-)  | 2111(-)  | 27390(+) |
| Soybean       | 1801(-)  | 1432(-)  | 712(-)  | 2761(-)  | 1052(-)  |
| Rapeseed      | 1844(-)  | 1732(-)  | 923(-)  | 1953(-)  | 1102(-)  |
| Wheat         | 2272(-)  | 1613 (-) | 844(-)  | 1786(-)  | 883(-)   |
| Rice          | 2139(-)  | 2290(-)  | 555(-)  | 2388(-)  | 1171(-)  |
| NTC $\bar{X}$ | 1892.72  | 1625.58  | 629.13  | 2127.92  | 1186.90  |
| NTC SD        | 252.08   | 189.34   | 90.95   | 282.29   | 257.30   |
| Threshold     | 2901.03  | 2382.95  | 992.95  | 3257.07  | 2216.08  |

481 RFU: Relative fluorescence units; PC: Positive control; NTC: No template control;  $\bar{X}$ : The average RFU of NTC;

482 SD: Standard deviation; Threshold:  $\bar{X}+4SD$ ; +: Positive signal; -: Negative signal.

483 Table 2 BT176, GA21, NK603 and TC1507 singleplex sensitivity assay.

| Samples | 10%(RFU) | 5%(RFU)  | 1%(RFU)  | 0.5%(RFU) | NTC $\bar{X}$ (RFU) | NTC SD(RFU) | Threshold(RFU) |
|---------|----------|----------|----------|-----------|---------------------|-------------|----------------|
| BT176   | 64839(+) | 39269(+) | 20372(+) | 13588(+)  | 1892.72             | 252.08      | 2901.03        |
| GA21    | 13335(+) | 10053(+) | 7266(+)  | 4599(+)   | 1625.575            | 189.34      | 2382.95        |
| NK603   | 19677(+) | 16527(+) | 12133(+) | 6523(+)   | 629.13              | 90.95       | 992.95         |
| TC1507  | 58956(+) | 46595(+) | 29374(+) | 16715(+)  | 2127.29             | 282.29      | 3257.07        |

484 RFU: Relative fluorescence units; NTC: No template control; +: Positive signal;  $\bar{X}$ : The average RFU of NTC;

485 SD: Standard deviation of NTC; Threshold:  $\bar{X}+4SD$ .

486 Table 3 BT176, GA21, NK603 and TC1507 multiplex specificity assay.

| Samples | Maize genome(RFU) | NTC $\bar{X}$ (RFU) | NTC SD(RFU) | Threshold (RFU) |
|---------|-------------------|---------------------|-------------|-----------------|
| BT176   | 20056(+)          | 1166.24             | 188.22      | 1919.13         |
| GA21    | 26440(+)          | 1423.03             | 310.23      | 2663.94         |
| NK603   | 28880(+)          | 1004.99             | 211.64      | 1851.56         |
| TC1507  | 46763(+)          | 2284.97             | 358.86      | 3720.10         |

487 RFU: Relative fluorescence units; NTC: No template control;  $\bar{X}$ : The average RFU of NTC; SD: Standard

488 deviation of NTC; Threshold:  $\bar{X}+4SD$ ; +: Positive signal.

489

490 Table 4 BT176, GA21, NK603 and TC1507 multiplex sensitivity assay.

| Samples | 10%(RFU) | 5%(RFU)  | 1%(RFU)  | 0.5%(RFU) | NTC $\bar{X}$ (RFU) | NTC SD(RFU) | Threshold(RFU) |
|---------|----------|----------|----------|-----------|---------------------|-------------|----------------|
| BT176   | 19564(+) | 14408(+) | 9737(+)  | 4875(+)   | 1166.24             | 188.22      | 1919.13        |
| GA21    | 17434(+) | 12345(+) | 7979(+)  | 5682(+)   | 1423.03             | 310.23      | 2663.94        |
| NK603   | 14851(+) | 11199(+) | 6695(+)  | 4572(+)   | 1004.99             | 211.64      | 1851.56        |
| TC1507  | 31726(+) | 19579(+) | 10849(+) | 8173(+)   | 2284.97             | 358.86      | 3720.10        |

491 RFU: Relative fluorescence units; NTC: No template control;  $\bar{X}$ : The average RFU of NTC; SD: Standard

492 deviation of NTC; Threshold:  $\bar{X}+4SD$ ; +: Positive signal.

493 Table 5 Repeatability of the RFU of four GM Maize standard plasmids at 10<sup>6</sup> copies

494

| 106 Copies Plasmids | Intra-assay(RFU) |        |      | Inter-assay(RFU) |         |       |
|---------------------|------------------|--------|------|------------------|---------|-------|
|                     | AVE              | SD     | CV%  | AVE              | SD      | CV%   |
| BT176               | 39855.2          | 932.26 | 2.34 | 38027.7          | 3641.87 | 9.58  |
| GA21                | 38587.7          | 658.87 | 1.71 | 37467.2          | 4145.06 | 11.06 |
| NK603               | 38846.3          | 469.82 | 1.21 | 36877.9          | 145.06  | 11.24 |
| TC1507              | 38846.3          | 219.25 | 0.62 | 34649.3          | 5036.17 | 14.53 |

495

496 AVE: Mean relative fluorescence units; SD: Standard deviation; CV: Coefficient of variation; RFU: Relative  
 497 fluorescence units.

498 Table 6 Quantification of four GM maize content in three simulated samples

| Samples           | Fluorophores | RFU   |       |       | AVE      | SD      | Copies     | GM%  |
|-------------------|--------------|-------|-------|-------|----------|---------|------------|------|
|                   |              | 1     | 2     | 3     |          |         |            |      |
| BT176 MPFS assay  |              |       |       |       |          |         |            |      |
| T1 (1%)           | FAM          | 16490 | 15282 | 15697 | 15823.00 | 501.15  | 113158.22  | 1.06 |
| T2 (3%)           | FAM          | 18842 | 19676 | 18961 | 19159.67 | 368.32  | 276694.01  | 2.95 |
| T3 (5%)           | FAM          | 22453 | 21604 | 21916 | 21991.00 | 350.64  | 526872.47  | 5.03 |
| GA21 MPFS assay   |              |       |       |       |          |         |            |      |
| T1 (1%)           | HEX          | 16929 | 17966 | 17073 | 17322.67 | 458.69  | 110370.27  | 1.03 |
| T2 (3%)           | HEX          | 21560 | 19942 | 20470 | 20657.33 | 673.70  | 276504.32  | 2.95 |
| T3 (5%)           | HEX          | 22972 | 23029 | 23947 | 23316.00 | 446.79  | 519976.30  | 4.96 |
| NK603 MPFS assay  |              |       |       |       |          |         |            |      |
| T1 (1%)           | ROX          | 14721 | 15764 | 14816 | 15100.33 | 470.88  | 107207.75  | 1.00 |
| T2 (3%)           | ROX          | 19064 | 18180 | 18214 | 18486.00 | 408.94  | 275183.45  | 2.93 |
| T3 (5%)           | ROX          | 20906 | 22019 | 20842 | 21255.67 | 540.39  | 527419.58  | 5.03 |
| TC1507 MPFS assay |              |       |       |       |          |         |            |      |
| T1 (1%)           | NED          | 15283 | 14942 | 14579 | 14934.67 | 287.45  | 109897.97  | 1.03 |
| T2 (3%)           | NED          | 17904 | 18415 | 18302 | 18207.00 | 219.16  | 282685.63  | 3.01 |
| T3 (5%)           | NED          | 20930 | 20956 | 20302 | 20729.33 | 302.36  | 524815.15  | 5.01 |
| IVR MPFS assay    |              |       |       |       |          |         |            |      |
| T1                | CY5          | 39570 | 40607 | 40288 | 40155    | 433.67  | 10692504.1 |      |
| T2                | CY5          | 41284 | 36254 | 39960 | 39166    | 2128.86 | 9380519.15 |      |
| T3                | CY5          | 40822 | 40539 | 38636 | 39999    | 970.69  | 10476239.7 |      |

499 T1: 1% BT176, 1% GA21, 1% NK603, 1% TC1507, 96% Non-GM maize. T2: 3% BT176, 3% GA21, 3% NK603,  
 500 3% TC1507, 88% Non-GM maize. T3: 5% BT176, 5% GA21, 5% NK603, 5% TC1507, 80% Non-GM maize ;  
 501 RFU: Relative fluorescence units; AVE: Mean relative fluorescence units; SD: standard deviation; CV: coefficient  
 502 of variation; GM% : Genetically modified maize content.

503 Table 7 Multiplex foodborne pathogenic bacteria specificity assay

| Samples          | Genome(RFU) | NTC $\bar{X}$ (RFU) | NTC SD(RFU) | Threshold |
|------------------|-------------|---------------------|-------------|-----------|
| Salmonella       | 33994(+)    | 1316.52             | 222.11      | 2204.96   |
| L. monocytogenes | 12538(+)    | 1826.74             | 235.13      | 2767.25   |
| E. coli          | 22447(+)    | 882.10              | 175.11      | 1582.53   |
| S. aureus        | 13278(+)    | 3026.25             | 562.51      | 5276.27   |

504 RFU: Relative fluorescence units; NTC: No template control;  $\bar{X}$ : The average RFU of NTC; SD: Standard  
 505 deviation; Threshold:  $\bar{X}+4SD$ ; +: Positive signal; L. monocytogenes: Listeria monocytogenes; E. coli:  
 506 Escherichia coli; S. aureus: Staphylococcus aureus.

507 Table 8 Repeatability of the RFU of four foodborne pathogenic bacteria standard  
 508 plasmids at  $10^6$  copies

| $10^6$ Copies Plasmids | Intra-assay |        |      | Inter-assay |         |       |
|------------------------|-------------|--------|------|-------------|---------|-------|
|                        | AVE         | SD     | CV%  | AVE         | SD      | CV%   |
| Salmonella             | 36065       | 963.43 | 2.67 | 36159.8     | 4253.83 | 11.76 |
| L. monocytogenes       | 39208.3     | 579.29 | 1.48 | 37504.1     | 3400.74 | 9.07  |
| E. coli                | 38827.9     | 473.30 | 1.22 | 39647.6     | 4231.33 | 10.67 |
| S. aureus              | 38952.9     | 596.13 | 1.53 | 35523.1     | 4147.47 | 11.68 |

509

510 AVE: mean relative fluorescence units; SD: standard deviation; CV: coefficient of variation;

511 L. monocytogenes: *Listeria monocytogenes*; E. coli: *Escherichia coli*; S. aureus: *Staphylococcus aureus*.

512 Table 9 Primer sequences and excitation and emission wavelength of fluorophores

| Primer name        | Sequence                            | Fluorophores | Excitation | Emission   |
|--------------------|-------------------------------------|--------------|------------|------------|
|                    |                                     |              | Wavelength | Wavelength |
| Bt176-F            | 5'-AAGCACGGTCAACTTCCGTAC-3'         | 5' FAM       | 470 nm     | 522 nm     |
| Bt176-R            | 5'-TCGACTTTATAGGAAGGGAGAGG-3'       |              |            |            |
| GA21-F             | 5'-CTTATCGTTATGCTATTTGCAACTTTAGA-3' | 5'HEX        | 505 nm     | 556 nm     |
| GA21-R             | 5'-TGGCTCGCGATCCTCCT-3'             |              |            |            |
| NK603-F            | 5'-CGGTACCAAGCTTTTATAATAGTAG-3'     | 5' ROX       | 550 nm     | 602 nm     |
| NK603-R            | 5'-CTAGTCTGTTATGGTTCGAG-3'          |              |            |            |
| 1507-F             | 5'-GCCAGTTAGGCCAGTTACCCA-3'         | 5' NED       | 530 nm     | 575 nm     |
| 1507-R             | 5'-CAAGATCAAGCGGAGTGAGG-3'          |              |            |            |
| IVR-F              | 5'-GTATCACAAGGGCTGGTACC-3'          | 5' CY5       | 630 nm     | 665 nm     |
| IVR-R              | 5'-CCGTGTAGAGCATGACGATC-3'          |              |            |            |
| Salmonella-F       | 5'-TTGTGCCGAAGAGCCGGCGT-3'          | 5' FAM       | 470 nm     | 522 nm     |
| Salmonella-R       | 5'-TTGCGAATAACATCCTCAAC-3'          |              |            |            |
| L. monocytogenes-F | 5'-GGTTTAGCTTGGGAATGGTG-3'          | 5'HEX        | 505 nm     | 556 nm     |
| L. monocytogenes-R | 5'-GATAAAGCGTAGTGCCCCAG-3'          |              |            |            |
| E. coli-F          | 5'-CGTCGTGTCTGCTAAAAC-3'            | 5' ROX       | 550 nm     | 602 nm     |
| E. coli-R          | 5'-GGTTGCTTGCCTTTGAGAC-3'           |              |            |            |
| S. aureus-F        | 5'-AAATCCAGCACAAACAGGAAACGACACA-3'  | 5' NED       | 530 nm     | 575 nm     |

S. aureus-R      5'-ATCTCCGGCCATAATTGGTGGCACT-3'

---

BT176

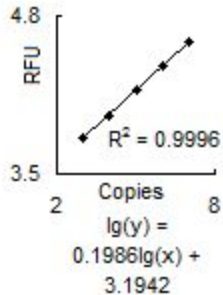

GA21

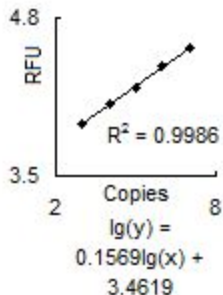

NK603

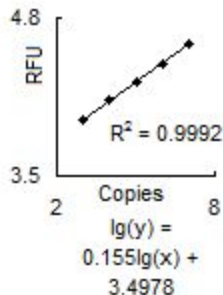

TC1507

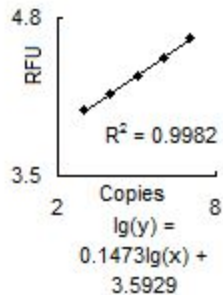

IVR

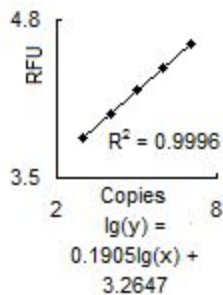

BT176

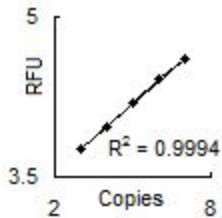

$$\lg(y) = 0.214\lg(x) + 3.1178$$

GA21

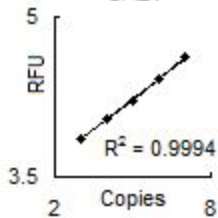

$$\lg(y) = 0.1917\lg(x) + 3.2719$$

NK603

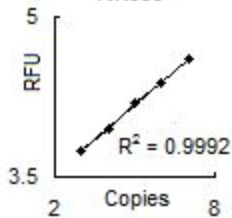

$$\lg(y) = 0.2146\lg(x) + 3.0995$$

TC1507

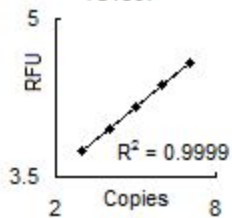

$$\lg(y) = 0.2097\lg(x) + 3.1171$$



Salmonella

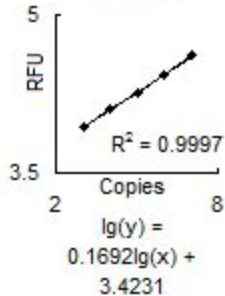

L. monocytogenes

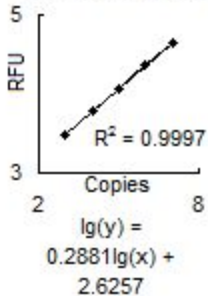

E. coli

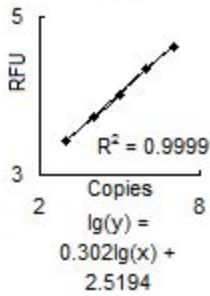

S. aureus

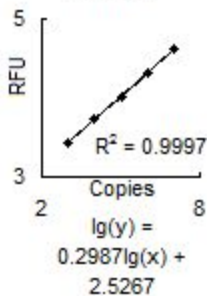

Source: http://biorxiv.org/content/10.1101/181974v1.full.pdf
